# Supplementary material
Source: bioRxiv or medRxiv preprint supplement (https://medrxiv.org/highwire/filestream/80683/field_highwire_adjunct_files/0/2020.05.09.20096560-1.pdf)
Supplement: Supplementary file [file 2020.05.09.20096560-1.pdf]

Supplementary Figures:

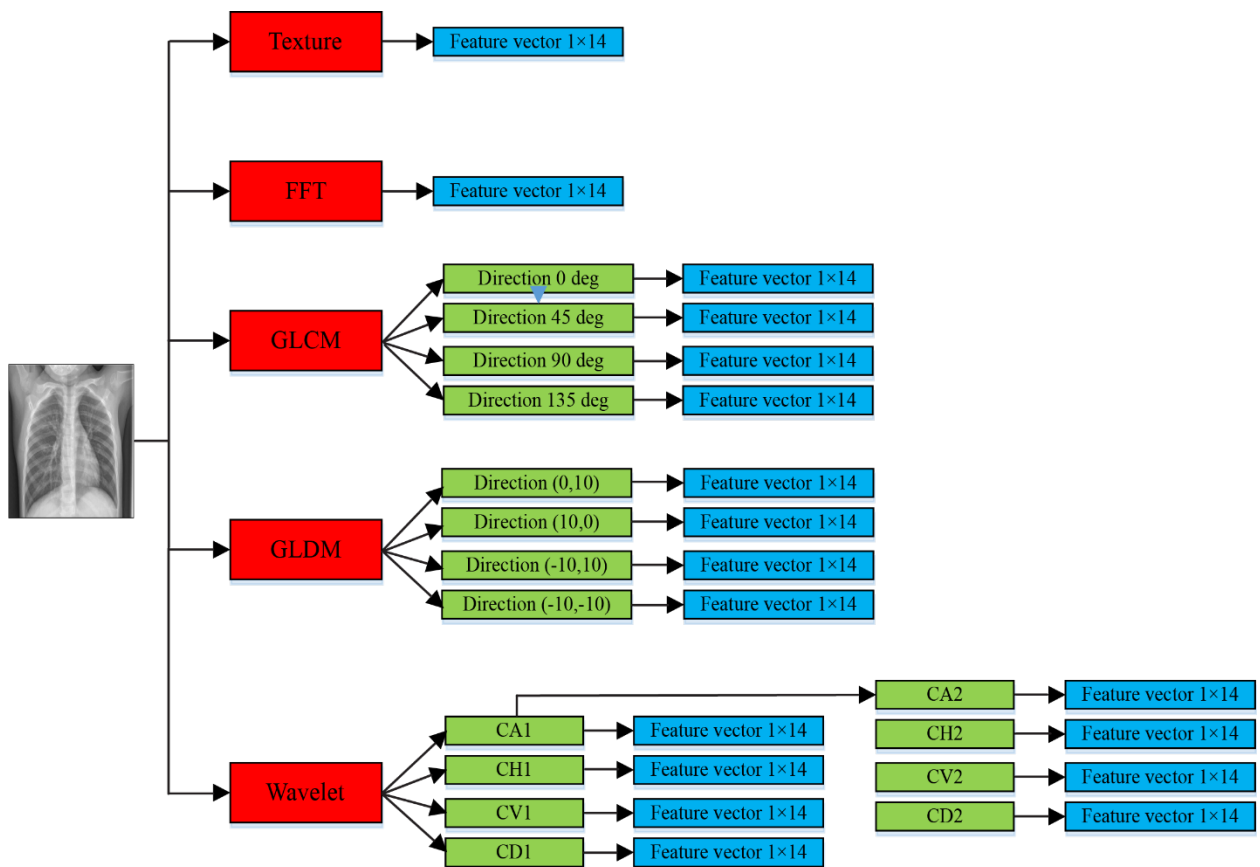

Supplementary Figure 1: The proposed feature extraction schematic diagram

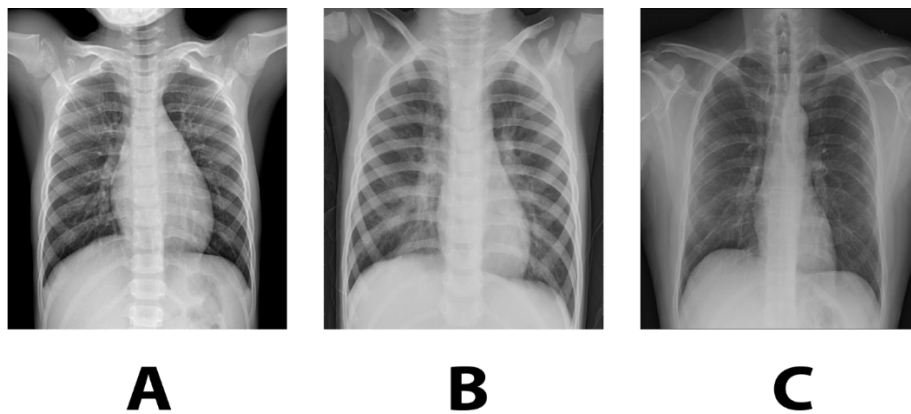

Supplementary Figure 2: Examples of A) Normal, B) Pneumonia, and C) COVID-19

**A**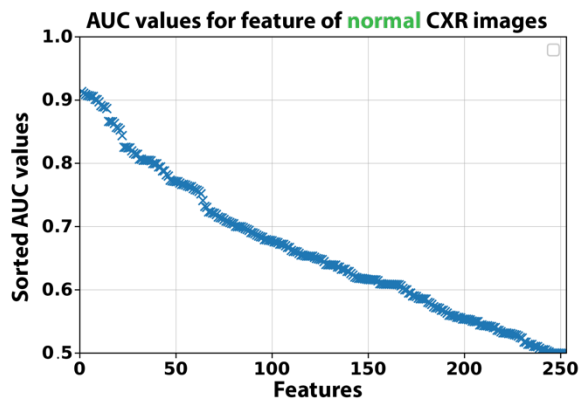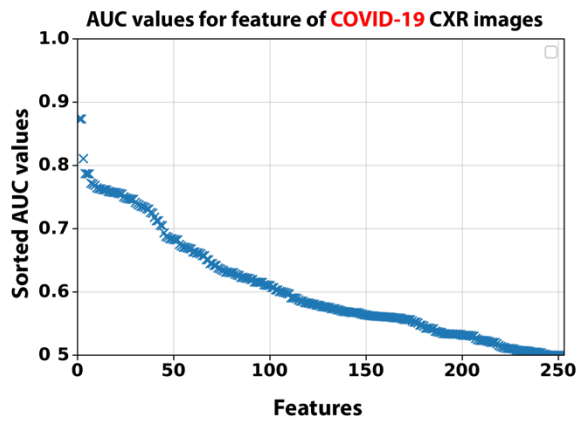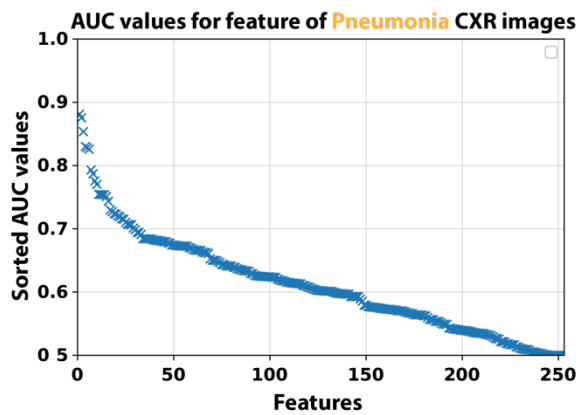**B**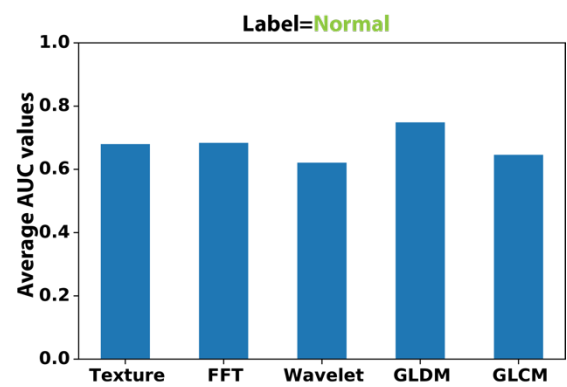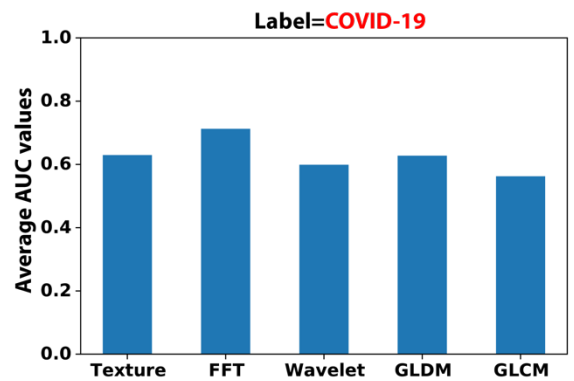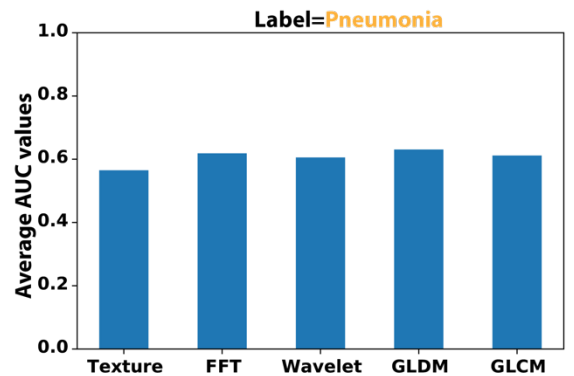

**Supplementary Figure 3:** A) The performance of the single features sorted based on their AUC values for three positive class labels. B) Comparison of the average performance of the five feature groups for three target classes.
